# Supplementary material for: The elite and the street: Black class and culture in post-World War Two Philadelphia
Source: Royal Society of Chemistry journal article supplement (doi:10.1039/b711807d), 2011-01-01
Supplement: b711807d.pdf [file b711807d.pdf]

Electronic Supplementary Information for

## **Boron-Oxygen Luminescence Centres in Boron-Nitrogen Systems**

Chengchun Tang,\* Yoshio Bando, Chunyi Zhi and Dmitri Golberg

Nanoscale Materials Center, National Institute for Materials Science, 1-1 Namiki,  
Tsukuba, Ibaraki 305-0044, Japan

### **(a) Experimental details**

*Boron nitride nanotubes:* The synthesis of multiwalled BN nanotubes has been accomplished via a carbon-free CVD reaction between Mg-B<sub>2</sub>O<sub>2</sub> precursor and ammonia. [C. Tang, Y. Bando, T. Sato and K. Kurashima, Chem. Commun. 2002, 1290.] The structures, defects and sample purities were evaluated in the published communication. The oxidation at 700 °C and reduction at 1000 °C of the BN nanotubes were carried out in a horizon furnace in oxygen and hydrogen flows for 2 hours, respectively.

*Boron-nitrogen-oxygen complex:* The basic boric acid-diethanolamine complex **1** was prepared through a condensation reaction. Boric acid (0.1 mol) was mixed with diethanolamine (0.1 mol) and heated at 70 °C until a transparent viscous liquid formed. A solid condensation product was then dehydrated in an evaporator with a low pressure (50 mmHg) and a high temperature (165 °C) over 24 hours. Elemental analysis (%) calcd for **1**: B 8.26, C 36.69, H 7.70, N 10.70; Found: B 8.25, C 36.86, H 7.81, N 10.79. FTIR vibrations of ~1400 (C-O), ~1070 (B-O), ~3400 (OH), ~710 and ~530 cm<sup>-1</sup> (O-B-O) were considered.

*Complex coordinated with NH<sub>2</sub><sup>-</sup> and N<sup>3-</sup>:* a mixture of **1** (2 g) and ethylenediamine or trioctylamine (30 mL) was loaded into a 50-mL teflon-lined stainless steel autoclave in a nitrogen atmosphere, heated to 180 °C and kept for 24 hours, to obtain yellow liquids. Compared with **1**, FTIR gave the new vibrations in ~1370 and 770 cm<sup>-1</sup> (B-N), ~720 and ~600 cm<sup>-1</sup> (N-B-O<sub>2</sub>) for both coordinated liquids, and ~1600 and ~2400 cm<sup>-1</sup> (N-H) for the ethylenediamine product, with a nearly disappeared OH vibration.

*Boron-nitride-oxide polymer:* Polymer contained BO<sub>2</sub><sup>-</sup> species was prepared by further condensation of **1** in trioctylamine up to 327 °C in a stainless steel autoclave. After the reaction for 4 days, the product was washed by trioctylamine for several times in a N<sub>2</sub> glove box, forming an air-sensitive solid that appears red to the eyes.

*Boron nitride crystals doped with BO:* Hexagonal BN crystals with BO<sup>-</sup> doping were prepared by reacting the polymer with ammonia at 900 °C for 2 hours and with oxygen

at 700 °C for 5 hours to remove carbon. The crystallization of BN was finally improved by annealing at 1500 °C for 5 hours in an argon flow. The treatment process might reduce the oxygen content by evaporating  $\text{BO}_x$  vapor, like,

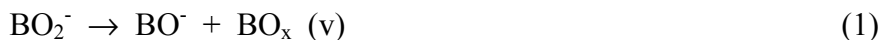

The detail about the transfer from  $\text{BO}_2^-$  to  $\text{BO}^-$  keeps unclear in this moment.

The oxidation effect for BN nanotubes was examined by transmission electron microscopy (TEM, JEOL 3010F). Cathodoluminescence spectrum was measured in the system that consists of a scanning electron microscope, a single monochromator, and a liquid-helium-cooled charge-coupled device. The content of C, N, H was analyzed by conventional elemental analysis and B by ICP. FTIR was measured by an infrared spectrometer (MAGNA-IR). The room-temperature photoluminescence spectrum and diffuse reflection spectrum were measured by a fluorescence spectrophotometer (Hitachi; F-5700) and an UV-VIS spectrophotometer with an integrating sphere (JASCO; Ubest V-560), respectively.

#### (b) Oxidation of boron nitride nanotubes

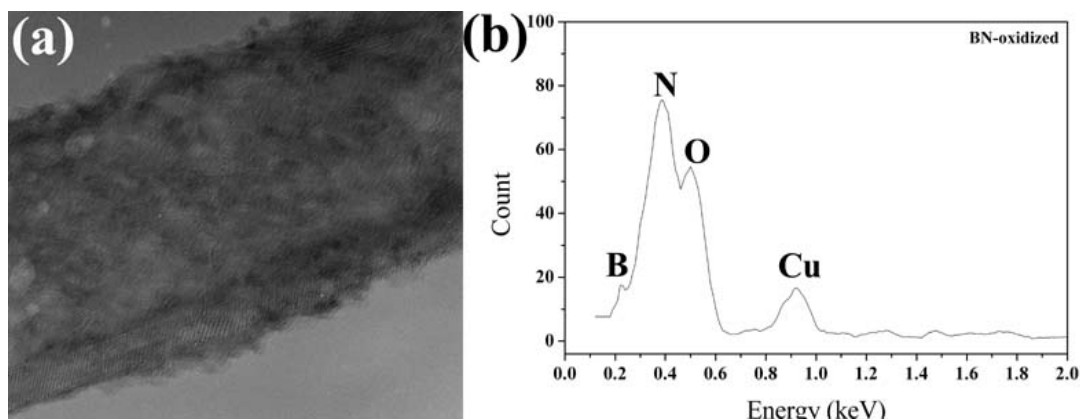

(a) High-resolution TEM picture showing a disorderly distribution of boron oxygen particles generated by oxidizing pure BN nanotubes in a flowing oxygen and (b) the corresponding EDS analyses.
